# Supplementary material for: Surprisingly complex supramolecular behaviour in the crystal structures of a family of mono-substituted salicylic acids
Source: Royal Society of Chemistry journal article supplement (doi:10.1039/c2ce25336d), 2012-01-01
Supplement: c2ce25336d.pdf [file c2ce25336d.pdf]

## Surprisingly Complex Supramolecular Behaviour in the Crystal Structures of a Family of Mono-substituted Salicylic Acids.

Riccardo Montis<sup>\*a</sup> and Michael B. Hursthouse<sup>a,b</sup>.

<sup>a</sup> School of Chemistry, University of Southampton, Southampton, SO17 1BJ, <sup>b</sup> Department of Chemistry, Faculty of Science, King Abdulaziz University, Jeddah 21588, Saudi Arabia.

### Electronic Supplementary Information

#### 1. Crystallographic Data

|                                                | 3-MeO h                                       | 3-MeO                                        | 4-MeO                                        | 5-MeO                                        | 6-MeO                                        | 3-NO <sub>2</sub> h                           | 5-NO <sub>2</sub>                             |
|------------------------------------------------|-----------------------------------------------|----------------------------------------------|----------------------------------------------|----------------------------------------------|----------------------------------------------|-----------------------------------------------|-----------------------------------------------|
| <b>Formula</b>                                 | C <sub>8</sub> H <sub>10</sub> O <sub>5</sub> | C <sub>8</sub> H <sub>8</sub> O <sub>4</sub> | C <sub>7</sub> H <sub>7</sub> NO <sub>6</sub> | C <sub>7</sub> H <sub>5</sub> NO <sub>5</sub> |
| <b>M.w.</b>                                    | 186.16                                        | 168.14                                       | 168.14                                       | 168.14                                       | 168.14                                       | 201.14                                        | 183.12                                        |
| <b>Crystal system</b>                          | monoclinic                                    | monoclinic                                   | monoclinic                                   | monoclinic                                   | monoclinic                                   | monoclinic                                    | triclinic                                     |
| <b>Space group</b>                             | P2 <sub>1</sub> /c                            | P2 <sub>1</sub> /n                           | P2 <sub>1</sub> /c                           | P2 <sub>1</sub> /c                           | P2 <sub>1</sub> /n                           | P2 <sub>1</sub> /c                            | P-1                                           |
| <b>a / Å</b>                                   | 17.9971(3)                                    | 3.7935(2)                                    | 4.9629(2)                                    | 3.97840(10)                                  | 6.6697(2)                                    | 3.5943(2)                                     | 5.1246(5)                                     |
| <b>b / Å</b>                                   | 14.3789(2)                                    | 27.8954(16)                                  | 11.0915(8)                                   | 16.1049(4)                                   | 9.3476(4)                                    | 21.115(2)                                     | 8.7762(8)                                     |
| <b>c / Å</b>                                   | 6.73370(10)                                   | 7.0172(4)                                    | 13.6559(9)                                   | 11.5198(3)                                   | 12.2016(5)                                   | 10.7227(10)                                   | 9.2674(9)                                     |
| <b>α / °</b>                                   | 90.00                                         | 90.00                                        | 90.00                                        | 90.00                                        | 90.00                                        | 90.00                                         | 62.252(6)                                     |
| <b>β / °</b>                                   | 91.1210(10)                                   | 94.891(3)                                    | 98.788(4)                                    | 90.261(2)                                    | 104.305(2)                                   | 98.950(6)                                     | 75.292(6)                                     |
| <b>γ / °</b>                                   | 90.00                                         | 90.00                                        | 90.00                                        | 90.00                                        | 90.00                                        | 90.00                                         | 82.654(7)                                     |
| <b>V / Å<sup>3</sup></b>                       | 1742.20(5)                                    | 739.86(7)                                    | 742.88(8)                                    | 738.09(3)                                    | 737.13(5)                                    | 803.87(12)                                    | 356.76(6)                                     |
| <b>T / K</b>                                   | 120(2)                                        | 120(2)                                       | 120(2)                                       | 120(2)                                       | 120(2)                                       | 120(2)                                        | 120(2)                                        |
| <b>Crystal shape</b>                           | block                                         | block                                        | block                                        | needle                                       | block                                        | prism                                         | plate                                         |
| <b>Colour</b>                                  | colourless                                    | colourless                                   | colourless                                   | colourless                                   | colourless                                   | colourless                                    | colourless                                    |
| <b>Z</b>                                       | 8                                             | 4                                            | 4                                            | 4                                            | 4                                            | 4                                             | 2                                             |
| <b>All reflns</b>                              | 25551                                         | 8164                                         | 10375                                        | 11278                                        | 7885                                         | 9655                                          | 6568                                          |
| <b>Un. reflns</b>                              | 3981                                          | 1678                                         | 1704                                         | 1685                                         | 1678                                         | 1833                                          | 1634                                          |
| <b>R<sub>int</sub></b>                         | 0.0317                                        | 0.0470                                       | 0.0532                                       | 0.0337                                       | 0.0404                                       | 0.0826                                        | 0.0477                                        |
| <b>R<sub>1</sub><sup>obs</sup>[I&gt;2σ(I)]</b> | 0.0368                                        | 0.0470                                       | 1704                                         | 0.0375                                       | 0.0514                                       | 0.0654                                        | 0.0474                                        |
| <b>R<sub>1</sub><sup>all</sup></b>             | 0.0435                                        | 0.0532                                       | 0.0640                                       | 0.0405                                       | 0.0599                                       | 0.1150                                        | 0.0734                                        |
| <b>wR2(obs)</b>                                | 0.0912                                        | 0.1122                                       | 0.1178                                       | 0.0985                                       | 0.1418                                       | 0.1271                                        | 0.1115                                        |
| <b>wR2 (all)</b>                               | 0.0959                                        | 0.1187                                       | 0.1274                                       | 0.1017                                       | 0.1491                                       | 0.1441                                        | 0.1278                                        |

  

|                                                | 4-ACM                                         | 5-ACM h                                        | 4-NH <sub>2</sub>                             | 5-NH <sub>2</sub>                             | 4-Cl                                           | 5-Cl h                                         | 5-Cl                                           |
|------------------------------------------------|-----------------------------------------------|------------------------------------------------|-----------------------------------------------|-----------------------------------------------|------------------------------------------------|------------------------------------------------|------------------------------------------------|
| <b>Formula</b>                                 | C <sub>9</sub> H <sub>9</sub> NO <sub>4</sub> | C <sub>9</sub> H <sub>11</sub> NO <sub>5</sub> | C <sub>7</sub> H <sub>7</sub> NO <sub>3</sub> | C <sub>7</sub> H <sub>7</sub> NO <sub>3</sub> | C <sub>7</sub> H <sub>5</sub> ClO <sub>3</sub> | C <sub>7</sub> H <sub>7</sub> ClO <sub>4</sub> | C <sub>7</sub> H <sub>5</sub> ClO <sub>3</sub> |
| <b>M.w.</b>                                    | 195.17                                        | 213.19                                         | 153.14                                        | 153.14                                        | 172.56                                         | 190.58                                         | 172.56                                         |
| <b>Crystal system</b>                          | orthorhombic                                  | orthorhombic                                   | monoclinic                                    | monoclinic                                    | monoclinic                                     | triclinic                                      | monoclinic                                     |
| <b>Space group</b>                             | Pna2 <sub>1</sub>                             | P2 <sub>1</sub> 2 <sub>1</sub> 2 <sub>1</sub>  | P2 <sub>1</sub> /n                            | P2 <sub>1</sub> /n                            | P2 <sub>1</sub> /c                             | P-1                                            | P2 <sub>1</sub> /c                             |
| <b>a / Å</b>                                   | 13.5482(8)                                    | 3.7472(4)                                      | 7.1371(3)                                     | 3.7239(2)                                     | 3.7241(2)                                      | 3.7289(1)                                      | 23.3708(10)                                    |
| <b>b / Å</b>                                   | 5.0245(3)                                     | 11.5109(17)                                    | 3.7278(2)                                     | 7.3696(4)                                     | 14.4178(8)                                     | 8.2430(4)                                      | 3.7089(1)                                      |
| <b>c / Å</b>                                   | 12.9394(6)                                    | 21.979(3)                                      | 24.4465(12)                                   | 23.3107(11)                                   | 12.9156(6)                                     | 13.0565(7)                                     | 16.5722(7)                                     |
| <b>α / °</b>                                   | 90.00                                         | 90.00                                          | 90.00                                         | 90.00                                         | 90.00                                          | 80.768(2)                                      | 90.00                                          |
| <b>β / °</b>                                   | 90.00                                         | 90.00                                          | 94.386(2)                                     | 91.806(3)                                     | 97.933(3)                                      | 87.719(3)                                      | 104.853(2)                                     |
| <b>γ / °</b>                                   | 90.00                                         | 90.00                                          | 90.00                                         | 90.00                                         | 90.00                                          | 83.755(3)                                      | 90.00                                          |
| <b>V / Å<sup>3</sup></b>                       | 880.82(8)                                     | 948.0(2)                                       | 648.51(5)                                     | 639.41(6)                                     | 686.84(6)                                      | 393.67(3)                                      | 1388.48(9)                                     |
| <b>T / K</b>                                   | 120(2)                                        | 120(2)                                         | 120(2)                                        | 120(2)                                        | 120(2)                                         | 120(2)                                         | 120(2)                                         |
| <b>Crystal shape</b>                           | plate                                         | lath                                           | plate                                         | plate                                         | block                                          | block                                          | lath                                           |
| <b>Colour</b>                                  | colourless                                    | colourless                                     | colourless                                    | colourless                                    | colourless                                     | colourless                                     | colourless                                     |
| <b>Z</b>                                       | 4                                             | 4                                              | 4                                             | 4                                             | 4                                              | 2                                              | 8                                              |
| <b>All reflns</b>                              | 5835                                          | 4592                                           | 6128                                          | 5940                                          | 5857                                           | 7078                                           | 9922                                           |
| <b>Un. reflns</b>                              | 1894                                          | 1959                                           | 1475                                          | 1460                                          | 1556                                           | 1796                                           | 3153                                           |
| <b>R<sub>int</sub></b>                         | 0.0428                                        | 0.0725                                         | 0.0400                                        | 0.0443                                        | 0.0457                                         | 0.0313                                         | 0.0617                                         |
| <b>R<sub>1</sub><sup>obs</sup>[I&gt;2σ(I)]</b> | 0.0390                                        | 0.0796                                         | 0.0458                                        | 0.0460                                        | 0.0488                                         | 0.0304                                         | 0.0489                                         |
| <b>R<sub>1</sub><sup>all</sup></b>             | 0.0461                                        | 0.1184                                         | 0.0560                                        | 0.0460                                        | 0.0638                                         | 0.0342                                         | 0.0829                                         |
| <b>wR2(obs)</b>                                | 0.0933                                        | 0.1559                                         | 0.1123                                        | 0.1159                                        | 0.0944                                         | 0.0750                                         | 0.1034                                         |
| <b>wR2 (all)</b>                               | 0.0980                                        | 0.1795                                         | 0.1221                                        | 0.1270                                        | 0.1033                                         | 0.0750                                         | 0.1206                                         |

|                                                                  | 5-I $\alpha$                                  | 5-I $\beta$                                   | SA                                           | 6-F                                           | 5-Br $\alpha$                                  | 5-Br $\beta$                                   | 4-Me                                         | 5-Me                                         |
|------------------------------------------------------------------|-----------------------------------------------|-----------------------------------------------|----------------------------------------------|-----------------------------------------------|------------------------------------------------|------------------------------------------------|----------------------------------------------|----------------------------------------------|
| <b>Formula</b>                                                   | C <sub>7</sub> H <sub>5</sub> IO <sub>3</sub> | C <sub>7</sub> H <sub>5</sub> IO <sub>3</sub> | C <sub>7</sub> H <sub>6</sub> O <sub>3</sub> | C <sub>7</sub> H <sub>5</sub> FO <sub>3</sub> | C <sub>7</sub> H <sub>5</sub> BrO <sub>3</sub> | C <sub>7</sub> H <sub>5</sub> BrO <sub>3</sub> | C <sub>8</sub> H <sub>8</sub> O <sub>3</sub> | C <sub>8</sub> H <sub>8</sub> O <sub>3</sub> |
| <b>M.w.</b>                                                      | 264.01                                        | 264.01                                        | 138.12                                       | 156.11                                        | 217.02                                         | 217.02                                         | 152.14                                       | 152.14                                       |
| <b>Crystal system</b>                                            | monoclinic                                    | triclinic                                     | monoclinic                                   | monoclinic                                    | triclinic                                      | triclinic                                      | triclinic                                    | monoclinic                                   |
| <b>Space group</b>                                               | C2/c                                          | P-1                                           | P2 <sub>1</sub> /c                           | P2 <sub>1</sub> /n                            | P-1                                            | P-1                                            | P-1                                          | P2 <sub>1</sub> /n                           |
| <b>a / Å</b>                                                     | 38.4671(15)                                   | 4.8289(1)                                     | 4.8894(3)                                    | 5.3146(2)                                     | 4.85140(10)                                    | 6.9625(2)                                      | 3.8685(3)                                    | 7.2810(3)                                    |
| <b>b / Å</b>                                                     | 4.5765(2)                                     | 12.1776(3)                                    | 11.2411(13)                                  | 5.2118(2)                                     | 11.6936(3)                                     | 7.1714(3)                                      | 7.2380(9)                                    | 5.0146(2)                                    |
| <b>c / Å</b>                                                     | 19.9300(7)                                    | 14.6529(4)                                    | 11.3347(13)                                  | 22.5378(10)                                   | 14.4341(3)                                     | 8.0160(3)                                      | 13.2142(15)                                  | 20.2789(7)                                   |
| <b><math>\alpha</math> / °</b>                                   | 90.00                                         | 109.752(1)                                    | 90.00                                        | 90.00                                         | 109.991 (1)                                    | 82.112(2)                                      | 100.756(5)                                   | 90.00                                        |
| <b><math>\beta</math> / °</b>                                    | 118.789(2)                                    | 97.974(2)                                     | 91.919(7)                                    | 91.907(3)                                     | 98.066(2)                                      | 73.835(2)                                      | 93.271(7)                                    | 95.498(2)                                    |
| <b><math>\gamma</math> / °</b>                                   | 90.00                                         | 100.626(2)                                    | 90.00                                        | 90.00                                         | 101.168 (1)                                    | 71.272(2)                                      | 90.788(7)                                    | 90.00                                        |
| <b>V / Å<sup>3</sup></b>                                         | 3074.9(2)                                     | 777.99(3)                                     | 622.63(11)                                   | 623.92(4)                                     | 735.75(3)                                      | 363.56(2)                                      | 362.80(7)                                    | 737.00(5)                                    |
| <b>T / K</b>                                                     | 120(2)                                        | 120(2)                                        | 120(2)                                       | 120(2)                                        | 120(2)                                         | 120(2)                                         | 120(2)                                       | 120(2)                                       |
| <b>Crystal shape</b>                                             | block                                         | block                                         | needle                                       | plate                                         | block                                          | plate                                          | block                                        | lath                                         |
| <b>Colour</b>                                                    | colourless                                    | colourless                                    | colourless                                   | colourless                                    | colourless                                     | colourless                                     | colourless                                   | colourless                                   |
| <b>Z</b>                                                         | 16                                            | 4                                             | 4                                            | 4                                             | 4                                              | 2                                              | 2                                            | 4                                            |
| <b>All reflns</b>                                                | 11602                                         | 18951                                         | 5347                                         | 8172                                          | 10539                                          | 7522                                           | 6688                                         | 8182                                         |
| <b>Un. reflns</b>                                                | 3442                                          | 3566                                          | 1413                                         | 1420                                          | 3325                                           | 1677                                           | 1630                                         | 1695                                         |
| <b>R<sub>int</sub></b>                                           | 0.0356                                        | 0.0378                                        | 0.0462                                       | 0.0418                                        | 0.0231                                         | 0.0340                                         | 0.0619                                       | 0.0466                                       |
| <b>R<sub>1</sub><sup>obs</sup>[I&gt;2<math>\sigma</math>(I)]</b> | 0.0340                                        | 0.0356                                        | 0.0656                                       | 0.0484                                        | 0.0212                                         | 0.0250                                         | 0.0653                                       | 0.0516                                       |
| <b>R<sub>1</sub><sup>all</sup></b>                               | 0.0493                                        | 0.0308                                        | 0.1041                                       | 0.0581                                        | 0.0247                                         | 0.0298                                         | 0.1054                                       | 0.0654                                       |
| <b>wR2(obs)</b>                                                  | 0.0695                                        | 0.0578                                        | 0.1080                                       | 0.1213                                        | 0.0490                                         | 0.0532                                         | 0.1704                                       | 0.1164                                       |
| <b>wR2 (all)</b>                                                 | 0.0812                                        | 0.0602                                        | 0.1251                                       | 0.1276                                        | 0.0509                                         | 0.0584                                         | 0.1947                                       | 0.1267                                       |

**Table S 1.** Summary of crystallographic data

## 2. XPac: Supramolecular Constructs and Translational Vectors.

| SC  | D | Description                                          | Figs  | #  | Base    | Dependencies     |
|-----|---|------------------------------------------------------|-------|----|---------|------------------|
| A0  | 0 | Centrosymm. carboxylic acid dimer                    | -     | 18 | -       | -                |
| A11 | 1 | Stack of A0 dimers > translation                     | 9     | 8  | t1      | A0 → A11         |
| A12 | 1 | Tape of A0 dimers > translation                      | 11    | 2  | t2      | A0 → A12         |
| A13 | 1 | Steps row A0 dimers > translation                    | 13,14 | 3  | t3      | A0 → A13         |
| A14 | 1 | Stack of A0 dimers > translation                     | 9     | 5  | t4      | A0 → A14         |
| A15 | 1 | Stack of pairs of A0 dimers > inversion, translation | 9,10  | 2  | t5      | A0 → A15         |
| A16 | 1 | Row of A0 dimers > inversion, translation            | 18    | 6  | t6      | A0 → A16         |
| A17 | 1 | Chain of A0 dimers > inversion, translation          | 22    | 4  | t7      | A0 → A17         |
| X11 | 1 | Stack of single molecules > translation              | 9     | 12 | t1      | X0 → X11         |
| X12 | 1 | Stack of pairs of X11 > inversion                    | 9     | 7  | t1      | X0 → X11 → X12   |
| X13 | 1 | Row of single molecules > translation                | 12    | 6  | t8      | X0 → X13         |
| X14 | 1 | Stack of single molecules > translation              | 9     | 6  | t4      | X0 → X14         |
| A21 | 2 | Row of A11 stacks > translation                      | 16    | 5  | t1, t9  | A0·A11·A16 → A21 |
| A22 | 2 | Row of Zig-zag chains of A0 dimers > translation     | 17    | 2  | t1, t10 | A0·A11 → A22     |

**Isostructural:**

**5-Br  $\alpha$ , 5-I  $\beta$**

**Table S 2.** Supramolecular Construct descriptions. SC = Supramolecular Construct; D = dimensionality; Description, '>' = is related by; # = Number of structures in which construct occurs; Base = base vector of SC (see Table S3); Dependencies show lower dimensionality SCs present in given SC.

|                                 | <i>t1</i> | <i>d1</i> | <i>t2</i> | <i>d2</i> | <i>t3</i> | <i>d3</i> | <i>t4</i> | <i>d4</i> | <i>t5</i> | <i>d5</i> | <i>t6</i> | <i>d6</i> | <i>t7</i> | <i>d7</i> | <i>t8</i> | <i>d8</i> | <i>t9</i> | <i>d9</i> | <i>t10</i> | <i>d10</i> | $\delta$<br><i>t1, t7</i> | $\delta$<br><i>t1, t8</i> |    |
|---------------------------------|-----------|-----------|-----------|-----------|-----------|-----------|-----------|-----------|-----------|-----------|-----------|-----------|-----------|-----------|-----------|-----------|-----------|-----------|------------|------------|---------------------------|---------------------------|----|
| <b>3-MeO h</b>                  |           |           |           |           |           |           |           |           |           |           |           |           |           |           |           |           |           |           |            |            |                           |                           |    |
| <b>3-MeO</b>                    | 100       | 3.793     |           |           |           |           |           |           |           |           | -101      | 8.326     |           |           | 001       | 6.734     |           |           |            |            |                           |                           |    |
| <b>4-MeO</b>                    |           |           |           |           |           |           | 100       | 4.963     |           |           |           |           |           |           | 10-1      | 8.257     | 001       | 7.017     |            |            |                           | 94.89                     |    |
| <b>5-MeO</b>                    | 100       | 3.978     |           |           |           |           |           |           |           |           |           |           |           |           |           |           |           |           |            |            |                           |                           |    |
| <b>6-MeO</b>                    |           |           |           |           |           |           |           |           |           |           |           |           |           |           |           |           |           |           |            |            |                           |                           |    |
| <b>3-NO<sub>2</sub>h</b>        | 100       | 3.594     |           |           |           |           |           |           |           |           |           |           |           |           |           |           |           |           |            |            |                           |                           |    |
| <b>5-NO<sub>2</sub></b>         |           |           | 001       | 9.267     | -111      | 15.142    |           |           |           |           |           |           |           |           |           |           |           |           |            |            |                           |                           |    |
| <b>4-ACM</b>                    |           |           |           |           |           |           |           |           |           |           |           |           |           |           |           |           |           |           |            |            |                           |                           |    |
| <b>5-ACMh</b>                   | 100       | 3.747     |           |           |           |           |           |           |           |           |           |           |           |           |           |           |           |           |            |            |                           |                           |    |
| <b>4-NH<sub>2</sub></b>         | 0-10      | 3.728     |           |           |           |           |           |           |           |           |           |           |           |           | -100      | 7.137     | 100       | 7.137     |            |            |                           | 90                        |    |
| <b>5-NH<sub>2</sub></b>         | -100      | 3.724     |           |           |           |           |           |           |           |           | -1-10     | 8.143     |           |           |           |           |           |           |            |            |                           |                           |    |
| <b>4-Cl</b>                     | 100       | 3.724     |           |           | 110       | 14.891    |           |           |           |           |           |           |           |           |           |           |           |           |            |            |                           |                           |    |
| <b>5-Clh</b>                    | 100       | 3.729     |           |           |           |           |           |           |           |           |           |           |           |           |           |           |           |           |            | 101        | 24.945                    |                           | 90 |
| <b>5-Cl</b>                     | 010       | 3.709     |           |           |           |           |           |           |           |           |           |           |           |           |           |           |           |           |            |            |                           |                           |    |
| <b>5-I <math>\alpha</math></b>  |           |           |           |           |           |           |           |           | 010       | 4.576     |           |           |           |           |           |           |           |           |            |            |                           |                           |    |
| <b>5-I <math>\beta</math></b>   |           |           |           |           |           |           |           |           |           |           |           |           | 2-10      | 16.881    |           |           |           |           |            |            |                           |                           |    |
| <b>SA</b>                       |           |           |           |           | -2-10     | 14.899    | -100      | 4.889     |           |           |           |           |           |           |           |           |           |           |            |            |                           |                           |    |
| <b>5-F</b>                      | -100      | 3.818     |           |           |           |           |           |           |           |           | 001       | 8.211     |           |           | -10-1     | 8.357     | 001       | 8.211     |            |            |                           | 78.83                     |    |
| <b>6-F</b>                      |           |           |           |           |           |           | 0-10      | 5.212     | -100      | 5.315     |           |           |           |           |           |           |           |           |            |            |                           |                           |    |
| <b>5-Br <math>\alpha</math></b> |           |           |           |           |           |           | 100       | 4.805     |           |           |           |           | 2-10      | 16.805    |           |           |           |           |            |            |                           |                           |    |
| <b>5-Br <math>\beta</math></b>  |           |           |           |           |           |           |           |           |           |           | 10-1      | 9.036     | 01-2      | 16.640    |           |           |           |           |            |            |                           |                           |    |
| <b>4-Me</b>                     | -100      | 3.868     |           |           |           |           |           |           |           |           | 110       | 8.160     |           |           | 0-10      | 7.238     | 010       | 7.238     |            |            |                           | 89.21                     |    |
| <b>5-Me</b>                     |           |           | 110       | 8.841     |           |           | 010       | 5.015     |           |           |           |           |           |           |           |           |           |           |            |            |                           |                           |    |
| <b>5-NO</b>                     | 00-1      | 3.667     |           |           |           |           |           |           |           |           | 011       | 8.826     |           |           | 0-10      | 8.028     | 010       | 8.028     | 1-11       | 24.412     | 90                        | 97.63                     |    |

**Table S 3.** Translation vectors *tn* with lengths *dn* (Å) and angles  $\delta$ (°).
